# 1 **Distribution and density of oxpeckers on giraffes in**

## 2 **Hwange National Park, Zimbabwe**

**Roxanne Gagnon<sup>1</sup>, Cheryl T. Mabika<sup>2</sup>, and Christophe Bonenfant<sup>3,4</sup>**

<sup>1</sup>Université de Sherbrooke, Département de biologie, 2500 Boulevard de l'Université, Sherbrooke, Québec J1K 2R1, Canada.

<sup>2</sup>Zimbabwe Parks and Wildlife Management Authority, Hwange Cluster, Main Camp, Zimbabwe.

<sup>3</sup>Université Claude Bernard – Lyon 1; UMR CNRS 5558, Laboratoire de Biométrie et Biologie Évolutive, F-69 622, Villeurbanne CEDEX, France.

ORCID: 0000-0002-9924-419X

<sup>4</sup>LTSER France, Zone Atelier "Hwange", Hwange National Park, Bag 62, Dete, Zimbabwe – CNRS HERD (Hwange Environmental Research Development) program

#### 4 **Correspondence**

5 C. Bonenfant

6 Email: [christophe.bonenfant@univ-lyon1.fr](mailto:christophe.bonenfant@univ-lyon1.fr)

**Abstract** Oxpeckers (*Buphagus sp.*) are two bird species closely associated to large mammals, including giraffes (*Giraffa camelopardalis*). We tested whether oxpeckers distributed themselves at random across individuals or aggregated on individual giraffes, and if birds select the host's body parts with the expected greatest amount of ticks. By counting oxpeckers on giraffe's body from photographs, we quantified the distribution of birds per hosts and over predefined zones on the giraffe body. Oxpeckers displayed a strong aggregation behaviour with few hosts carrying many birds while many carried a limited number or no birds, a pattern that was most exaggerated for males. Oxpeckers were disproportionately found on the mane and back, where the density of ticks is presumably the highest. This high aggregation level of birds is typical of parasitic species and could suggest that oxpecker distribution may mirror the distribution of ticks, their primary food resource, on giraffes. Abundance of ticks appears as a major driver of the oxpecker foraging behaviour, and the oxpecker–large herbivores system proves to be highly relevant for the study of host–parasite dynamics.

## 1 | INTRODUCTION

2 The distribution of animals in the environment results from a complex sequence of  
3 behavioural decisions aiming at satisfying the energy requirements of individuals while  
4 minimizing costs of movements, competition with con-specifics or other species, in balance  
5 with the perceived risks of predation for prey species (Krebs, 1972). Variation in habitat  
6 suitability, in space and time, is of prime importance to the ecology of species with  
7 consequences on its distribution range (MacArthur, 1972), its mating tactic (Emlen & Oring,  
8 1977), or its population dynamics (Lack, 1966; Ostfeld & Keesing, 2000). From an  
9 evolutionary perspective, animals should select habitats with the greater suitability (sensu  
10 Fretwell & Lucas, 1969), to maximize the individual fitness.

11 At the population level, when and where resources are available is a strong predictor of  
12 the abundance of animals. Assuming an homogeneous distribution of discrete resources  
13 patches in the landscape and a random walk of foraging animal trajectories, the expected  
14 number of foragers per patch is given by a Poisson distribution (Hutchinson & Waser,  
15 2007). This simple model of encounters between motile entities underpins most  
16 multi-species interaction models, including the Lotka-Volterra (Lotka, 1956; Hutchinson &  
17 Waser, 2007) or Nicholson-Bailey models (May, 1978) for, respectively, predators–prey and  
18 hosts–parasitoid dynamics. Any deviation from the Poisson distribution is usually  
19 interpreted as a sign of aggregation (over-dispersion) or avoidance (under-dispersion) of  
20 individuals (Pielou (1969, p. 96) but see Taylor et al. (1979) or Sjöberg et al. (2000) for a  
21 discussion and alternatives). Several indices have been proposed to quantify aggregation  
22 levels among populations or species from count data (see Kretzschmar and Adler 1993 for  
23 a review), the most widely used being the aggregation index  $k$  (Shaw et al., 1998).  
24 Aggregation may arise from the animal behaviour such as social interactions (Wittenberger,  
25 1981), constrain on mobility among patches (Gueron & Levin, 1995), or if animals perform  
26 area-restricted search of food patches (Morales et al., 2010) or do copy what the other  
27 con-specifics do when using public information (Clark & Mangel, 1986).

28 In multi-species interactions such as in bird vs. large mammals associations, the

1 distribution of the birds is first guided by the one of the mammalian hosts, conceptually  
2 equivalent to a resource patch. This scenario fits the association between oxpeckers  
3 (*Buphagus sp.*) and large herbivores, described in the early 20th century (Moreau, 1933).  
4 Yellow-billed (*B. africanus*) and red billed oxpecker (*B. erythrorynchus*) are two bird species  
5 of sub-Saharan Africa associated to savanna ecosystems (Hustler, 1987; Plantan, 2009;  
6 Palmer & Packer, 2018). Both species live and feed almost exclusively on the body of large  
7 herbivores such as African buffaloes (*Syncerus caffer caffer*), giraffes (*Giraffa*  
8 *camelopardalis*), black rhinoceros (*Diceros bicornis*), white rhinoceros (*Ceratotherium*  
9 *simum*), impalas (*Aepyceros melampus*), greater kudu (*Tragelaphus strepsiceros*),  
10 common elands (*Taurotragus oryx*) and sable antelopes (*Hippotragus niger*) (Hustler,  
11 1987; Stutterheim et al., 1988; Palmer & Packer, 2018), but red-billed oxpeckers seem to  
12 favor smaller sized hosts . Oxpeckers mainly prey upon ectoparasites of their large  
13 mammalian hosts although they sometimes can snatch tissues from their host  
14 (Bezuidenhout & Stutterheim, 1980). In terms of resource selection, the foraging behavior  
15 of oxpeckers can be decomposed into two main steps. The first step for birds is to localize  
16 large mammals in the landscape which, for oxpeckers represent motile and widely  
17 dispersed resources patches of varying size. The second event takes place on the host's  
18 body where oxpeckers will search for the most suitable body part in terms of ectoparasites.  
19 These sequential behavioural steps are organized according to hierarchical and  
20 complementary spatio-temporal scales (see Johnson, 1980), and drive the distribution of  
21 oxpeckers among host species (e.g. Diplock et al., 2018), among the different body part  
22 they forage on, down to the selected prey they feed on.

23 At a large spatial scale of observation, the distribution of oxpeckers among the different  
24 species of mammalian hosts has been documented for decades (Moreau, 1933; Grobler,  
25 1980; Hustler, 1987; Ndlovu & Combrink, 2015) with a clear preferences for large-bodied  
26 species with high tolerance to the presence of birds (Diplock et al., 2018). The giraffe  
27 hence appears to be one of the key host for the two oxpecker species (Grobler, 1980;  
28 Veríssimo et al., 2017). Much less is known about how oxpeckers are distributed among  
29 individuals of a given host species, and reporting on maximum records (e.g. 51 birds on

1 one side of a single giraffe, Veríssimo et al. (2017)) only gives a rough idea about this level  
2 of heterogeneity. Heterogeneity in the number of oxpeckers per hosts is however very likely  
3 as a recent comparison among large herbivores of different age and sex classes strongly  
4 suggests (Diplock et al., 2018). At the host level of resource selection (small spatial scale),  
5 oxpeckers have long been recognized to favor some body parts of their hosts (Mooring &  
6 Mundy (see 1996, for an example on impalas (*Aepiceros melampus*))) but what body parts  
7 is most attractive vary with the host species (Diplock et al., 2018; Palmer & Packer, 2018).  
8 For instance, Ndlovu & Combrink (2015) reported that red-billed oxpeckers were most  
9 frequently perch on the back and the head of buffaloes and white rhinoceros and that the  
10 neck was preferred on giraffes. Whether body part preferences of oxpeckers changes with  
11 individual host's characteristics remains poorly known.

12 In this paper we investigated the among-host and within-host distribution of oxpeckers  
13 on giraffes at Hwange National Park, Zimbabwe. We extracted the number and location of  
14 yellow-billed (*Buphagus africanus*) and red-billed oxpeckers on  $n = 683$  giraffes from 500  
15 photographs collected since 2013. We aimed at testing the random encounter model  
16 between foragers and hosts, and the ideal free distribution (IFD, Fretwell & Lucas, 1969)  
17 with oxpeckers as foragers and giraffes as their primary large mammalian hosts. We tested  
18 the three following predictions:

19 1. *Distribution of oxpeckers among giraffes*: By comparing the observed distribution of  
20 the number of oxpeckers per giraffe with the expected prediction from theoretical  
21 models, one may infer the underlying behaviour of resource selection by birds and  
22 their movements. If oxpeckers search for giraffes at random in the landscape the  
23 random encounter model predicts a Poisson distribution of birds among hosts  
24 (Hutchinson & Waser, 2007). Alternatively, if oxpeckers aggregate preferentially on  
25 some particular giraffes because of marked differences in the parasite load or  
26 because of copying behaviour, the model predicts a negative binomial distribution of  
27 birds among hosts (Pielou, 1969);

28 2. *Distribution of oxpeckers on giraffe body*: According to the IFD (Fretwell & Lucas,

1 1969), oxpeckers should be distributed on the giraffe body parts proportionally to the  
2 local ectoparasite load. Therefore, if the ectoparasite density is homogeneous over  
3 the whole giraffe body, the IFD predicts a homogeneous number of oxpeckers per  
4 area unit. Alternatively, if ectoparasites concentrate on some specific body parts, the  
5 IFD predicts a heterogeneous distribution of birds, with higher densities of oxpeckers  
6 on giraffe body parts with the higher ectoparasite burden (Horak et al., 1983;  
7 Mysterud et al., 2014). From previous observations (Plantan, 2009; Ndlovu &  
8 Combrink, 2015), giraffe body parts with the highest oxpecker number should be, in  
9 decreasing order, the mane, the neck, the scapula and the back;

10 3. *Sex-differences in bird load of giraffes*: Many studies evidenced that the ectoparasite  
11 load is proportional to the body mass and skin surface of the host (Horak et al., 1983,  
12 1987; Koenig, 1997). Consequently a bigger host should carry more ectoparasites  
13 and hence, more birds than a smaller one. Sexual size dimorphism is observed  
14 among many species and is particularly observable between male and female  
15 giraffes, reaching a 43% difference for fully grown individuals (Shorrocks, 2016). We  
16 will therefore test the prediction that more birds are present on male than on female  
17 giraffes (Diplock et al., 2018);

## 18 **2 | MATERIAL AND METHODS**

### 19 **2.1 | Study site**

20 This study was undertaken around Main Camp in the northeast of Hwange National Park ,  
21 the main biological reserve of Zimbabwe (HNP; 19°00'S, 26°30'E, extending from Main  
22 Camp to Giraffe's Spring and Ngweshla pans; Fig. 1). This park covers 14 650 km<sup>2</sup> and  
23 supports a population of approx. 2 800 giraffes (Shorrocks, 2016). The Bulawayo-Victoria  
24 Falls railway line defines the western boundary of HNP while border with Botswana draws  
25 the eastern boundary. The long-term mean annual rainfall is ca. 600 mm (CV = 25%) and  
26 generally falls between October and April to form seasonal wetlands. Because of this  
27 relatively low annual rainfall, a xerophile vegetation covers most of HNP. The woodland

1 vegetation consists primarily of African teak (*Baikiaea plurijuga*) intersected with patches of  
2 camel thorn (*Acacia erioloba*) or leadwood (*Combretum imberbe*). Bushland savanna with  
3 patches of grassland makes 64% of the area, mainly around the many artificially  
4 maintained waterholes. HNP hosts many large and mega-herbivore species attractive to  
5 oxpeckers, including giraffes, plain zebras (*Equus quagga*), African buffaloes, wildbeest  
6 (*Connochaetes taurinus*), greater kudu, waterbuck (*Kobus ellipsiprymnus*) and impala,  
7 and the less abundant sable and roan antelopes (*H. equinus*).

## 8 **2.2 | Oxpecker biology**

9 Red-billed oxpecker (RBO) and yellow-billed oxpecker (YBO) are two sympatric species,  
10 strictly african, which distribution ranges from Southern Africa up to Ethiopia on the East,  
11 with a few populations in Western Africa (del Hoyo et al., 2009). Although oxpeckers prey  
12 upon on ticks mainly, they can feed on wounded tissue, mucus, saliva, ear wax, hair and  
13 blood regularly (Bezuidenhout & Stutterheim, 1980; Weeks, 1999; Plantan, 2009). Some  
14 authors definitely think that the interaction between oxpeckers and mammalian hosts is  
15 parasitism, while others support mutualism even though they admit oxpeckers can cause  
16 injuries to hosts (van Someren, 1951; Samish & Rehacek, 1999). In fact the relationship  
17 between oxpeckers and hosts could be context-dependent, where birds can be  
18 opportunists under particular biotic and abiotic conditions (Moreau, 1933; Nunn et al.,  
19 2011; Plantan, 2009). For instance, a mutualistic relationship may develop when the  
20 ectoparasite load is high on the host, but oxpeckers may become parasitic when hosts  
21 carry few ticks with too many birds, and leads to numerous open wounds.

## 22 **2.3 | Data collection**

23 Oxpecker data derived from the study of giraffe ecology carried out at HNP. What giraffe  
24 sub-species (*sensu* Dagg, 2014) currently live in HNP is not known but could be either *G.*  
25 *c. angolensis* or *G. c. giraffa* according to the UICN (Muller et al., 2018). We have been  
26 monitoring the giraffe population opportunistically in 2012 and 2013, and on a regular basis  
27 since 2014, aiming at the photo-identification of individuals. Each year we drove the HNP

1 road network daily (Fig. 1) for at least three weeks in a row and took photographs of every  
2 encountered giraffes with 200mm to 300mm lenses mounted on Nikon DSRL cameras. For  
3 all encounters, we recorded the date, the location and the time of observation along with  
4 group size and composition the individuals belonged to. We sexed giraffes based on the  
5 presence of bare skin at the ossicone tip for males, and on shape of the skull or visible  
6 male genitals when possible. We classified giraffes into four age-classes (calf, juvenile,  
7 sub-adult and adult) assessed in the field from their size and coat color since giraffes  
8 darken with age (Dagg, 2014). In this study we used photographs taken between 2013 and  
9 2015, yielding a total of 500 photographs and, because several individuals were on the  
10 same frame sometimes, a sample size of 683 giraffes. Although we avoided to analyze a  
11 sequence of continuous photographs, re-observations of the same individual in time might  
12 have occurred, either during the same field session or from one year to another. For a  
13 given field session, if the same individuals are likely several days apart on average, we  
14 cannot exclude a few cases where the same giraffe has been seen on consecutive days  
15 (C.B pers. obs.). Doing so, we assumed little consequences of pseudo-replication on the  
16 results because of the rapid exchanges and movements of oxpeckers among hosts. We  
17 then counted oxpeckers on every giraffes seen on photographs and assigned each  
18 detected bird to one of the 14 predefined parts of the giraffe body (see Fig. 3A). Giraffe  
19 body parts were chosen so that they could easily be identified from landmark points  
20 whatever the point of view. From a flattened model of giraffe body (Fig. 3A), we  
21 approximated the relative area for the 14 considered parts with the *ImageJ* software.  
22 Relative surface ranged from  $< 1\%$  for armpits and groins together, to  $14\%$  for the neck, for  
23 instance.

24 We excluded approx. 50% of all photographs because giraffes were too distant to  
25 reliably spot oxpeckers which roughly corresponded to a giraffe relative size smaller than  
26  $\frac{1}{3}$  of the photograph height, or because of a poor image quality. Individuals whose whole  
27 body was not visible were rejected. For a subset of photographs we repeated oxpecker  
28 counts twice with two different observers (RG and CB) to estimate bird detection  
29 probability. Despite yellow-billed and red-billed oxpecker do occur at HNP, we did not



1 differentiate between the two species in our analyses. The main reason for this choice was  
2 the difficulty to identify the species correctly from photographs when the bird's beak was  
3 not clearly visible. It seems, however from the easiest cases, that the yellow-billed  
4 oxpecker is more abundant than the red-billed one (62 vs. 38% of our observation  
5 respectively).

## 6 **2.4 | Data analyses**

7 We first estimated the detection probability of individual oxpeckers from photographs by  
8 setting a double-observer experiment (Nichols et al., 2000). The two observers reported  
9 the total number of detected birds they found (noted  $x_{11}$  and  $x_{22}$ ) from which we calculated  
10 the number of birds seen by observer 1 and missed by 2 ( $x_{12}$ ) and conversely ( $x_{21}$ ). The  
11 double-observer method returns the detection probability of observer 1 and 2 (respectively  
12  $p_1$  and  $p_2$ ), as well as the average detection probability of birds  $p$ . The estimated number of  
13 oxpeckers per giraffe is then given by  $\hat{N} = (x_{11} + x_{22} + x_{12} + x_{21})/\hat{p}$ . We fit the  
14 double-observer model to our data with the *unmarked* library (Fiske & Chandler, 2011) and  
15 tested for the effect of host sex on the detection probabilities.

16 We derived the aggregation index  $k$  from a particular parameterization of the negative  
17 binomial distribution (where the variance  $V$  is related to the mean by  $V = \lambda + \lambda^2/k$ ) that  
18 takes values close to zero with increasing levels of aggregation. To compare with previous  
19 studies, we also estimated the preference of oxpeckers for given hosts with a preference  
20 index (PI), calculated as the number of hosts counted divided by the number of oxpeckers  
21 counted (Grobler, 1980). A PI of 5 means one bird is seen every fifth counted hosts on  
22 average. We computed confidence limits of point estimates of PI with a non-parametric  
23 bootstrap (Manly, 2007).

24 We estimated the relative distribution of oxpeckers on giraffe body parts with a  
25 multinomial logistic regression. This particular type of GLM estimates the 14 probabilities  
26 (noted  $\pi_i$ ) of birds to be located on each body part of the giraffe holding the constrain that  
27  $\sum_{i=1}^{14} \pi_i = 1$ . Because birds are more likely to be found on the largest body parts, we used  
28 the relative surface as an offset variable in the multinomial logistic regression to estimate

1 the relative probability of use of each body parts. To control for the imbalanced number of  
2 males and female giraffes among years, we entered year as a categorical variable before  
3 testing for the effect the host sex (a 2-levels categorical variable) on the relative density of  
4 oxpeckers on body parts with likelihood ratio tests using the *nnet* library (Venables &  
5 Ripley, 2002).

6 Finally, we modeled the number of oxpeckers per giraffe with generalized linear mixed  
7 models (GLMMs). We tested for effects of host sex (a 2-levels categorical variable) and  
8 group size (continuous variable ranging between 1 to 5) while accounting for the potential  
9 confounding effects of year, season and daytime (hour extracted from the photograph  
10 metadata) on the number of seen birds with random effect variables. We fitted the GLMM  
11 and tested the effects of the explanatory variables with likelihood ratio tests using the  
12 *glmmTMB* library (Brooks et al., 2017). Our response variable being count data, we first fit  
13 a Poisson model but also considered the more flexible negative binomial distribution to  
14 account for potential over-dispersion of oxpecker counts (Ver Hoef & Boveng, 2007). We  
15 ran all analyses in the **R** 3.6.1 statistical software (R Core Team, 2018). Unless otherwise  
16 stated, we reported all estimated parameters as mean  $\pm$  sd and predicted probabilities as  
17 the mean with its associated 95% confidence interval in brackets.

### 18 **3 | RESULTS**

19 From a subsample of  $n = 117$  giraffes, the overall detection probability of oxpeckers was  
20  $\hat{p} = 0.99$  (0.97, 1.00) but differed substantially between the two observers (RG:  
21  $\hat{p}_1 = 0.97$  (0.95, 0.98); CB:  $\hat{p}_2 = 0.85$  (0.81, 0.89)). Although oxpeckers have 1.3 more  
22 chances to be seen on a male than on female giraffe, detection probability did not differ  
23 significantly with the host sex (estimated difference between male and female hosts on the  
24 logit scale:  $\beta = 0.26 \pm 0.34$ ,  $P = 0.45$ ). On average we estimated oxpecker density to be  
25  $D_O = 2.91$  (2.63, 3.23) birds per giraffe once we accounted for imperfect detections. In the  
26 following analyses, RG did analyze all photographs.

27 When using  $n = 683$  giraffes, mean oxpecker density was  $2.16 \pm 3.01$  birds per host  
28 without accounting for detection probability. The overall preference index (PI) is  $0.46 \pm 0.10$

1 with a maximum number of oxpeckers counted on a single host of 17 (Fig. 2). In support of  
2 the aggregation hypothesis, the estimated aggregation coefficient  $\hat{k} = 0.68$  (0.58, 0.79)  
3 suggested a strong aggregation of oxpeckers on individual giraffes. Because the estimated  
4 aggregation coefficient  $k$  approaches zero, the negative binomial distribution converges to  
5 the logarithmic series distribution, with a strong skew toward giraffe carrying no bird  
6 (Fig. 2). Overall, our results lend support to the hypothesis of a non-random association  
7 between oxpeckers and giraffes at HNP ( $H_1$ ).

8 The relative distribution of oxpeckers on giraffe's body deviated strongly from uniformity  
9 with some body parts being much more used than others (Fig. 3B). Supporting our  
10 hypothesis  $H_2$ , birds gathered principally on the neck ( $\pi = 0.18$  (0.15, 0.20)) and mane  
11 ( $\pi = 0.25$  (0.21, 0.27)) of giraffes, but were rarely seen on the lower limbs ( $\pi < 0.01$ ) or on  
12 the tail ( $\pi < 0.01$ ). Oxpeckers did not use the giraffe's body differently according to the host  
13 sex (likelihood ratio test:  $\chi^2 = 28.68$ ,  $df = 13$ ,  $P = 0.07$ ; Fig. 3B), although relatively more  
14 birds used the ano-genital ( $\beta = 0.40 \pm 0.56$ ,  $P = 0.47$ ) and the scapula areas  
15 ( $\beta = 0.45 \pm 0.53$ ,  $P = 0.39$ ) of females compared to males. Conversely more birds were  
16 seen on the head ( $\beta = 1.53 \pm 0.57$ ,  $P < 0.001$ ) and rump ( $\beta = 1.17 \pm 0.54$ ,  $P = 0.03$ ) of  
17 male giraffes. Our results hence confirm the marked heterogeneous distribution of  
18 oxpeckers on the body of large mammalian hosts.

19 Although GLM with a Poisson distribution and a logarithmic link are usually  
20 recommended for count data (Agresti 2002), a preliminary goodness-of-fit (GOF) test  
21 suggested an over-dispersion of the data compared to a Poisson distribution ( $\chi^2 = 2877.21$ ,  
22  $df = 682$ ,  $P < 0.001$ ). A GLM with negative binomial distribution did fit the data better  
23 than with a Poisson distribution (GOF test:  $\chi^2 = 609.10$ ,  $df = 682$ ,  $P = 0.98$ ). The number of  
24 oxpecker per host decreased with group size for male giraffes ( $\beta = -0.23 \pm 0.13$ ,  $\chi^2 = 3.10$ ,  
25  $df = 1$ ,  $P = 0.07$ ; Fig. 5) but not for females ( $\beta = 0.07 \pm 0.06$ ; interaction sex by group size:  
26  $\beta = -0.34 \pm 0.13$ ,  $\chi^2 = 6.53$ ,  $df = 1$ ,  $P = 0.01$ ). As expected from our last hypothesis  $H_3$ ,  
27 the number of oxpeckers was larger on the giraffes exposing the largest body area to the  
28 birds (Fig 4). Accordingly, we found that oxpeckers were 20% more numerous on males  
29 than on females (density of  $2.57 \pm 0.23$  and  $1.97 \pm 0.14$  birds per giraffe respectively:

1  $\beta = 0.23 \pm 0.12$ ,  $\chi^2 = 3.75$ ,  $df = 1$ ,  $P = 0.05$ ). The sex-specific aggregation coefficient reads  
2  $k = 0.85 \pm 0.09$  and  $k = 0.62 \pm 0.07$  for females and males respectively, and was  
3 significantly smaller for male giraffes (bootstrap test:  $\beta = 0.23 \pm 0.13$ ,  $P = 0.02$ ). Similar to  
4 the mean, relative variability in the number of oxpeckers per host was slightly larger for  
5 male (CV = 1.49) than for female giraffes (CV = 1.29) (see also Fig. 4).

## 6 **4 | DISCUSSION**

7 The foraging behaviour and type of interaction between oxpeckers and their large  
8 mammalian hosts is poorly understood and still debated (Weeks, 2000; Nunn et al., 2011;  
9 Welsh et al., 2019). A closer look at the distribution of birds among and within giraffes at  
10 HNP clearly shows how heterogeneous it is at the host level with many carrying no bird  
11 while a few have  $> 10$  birds on them. We also provide empirical evidences for non-random  
12 choice of host body part by oxpeckers, a behaviour likely driven by the amount of ticks birds  
13 can find and share with conspecifics. Overall the observed oxpecker distribution among  
14 giraffes at HNP matches with distributions generally observed in parasitic organisms (May,  
15 1978), although we reckon it may only mirror the tick load of individual hosts.

16 At the largest spatio-temporal scale, oxpeckers have to chose among large herbivore  
17 species in the landscape, which is reflected by the host's preference index (PI). The  
18 observed  $PI = 0.46 \pm 0.10$  for giraffes at HNP is similar to previously reported values in  
19 Kruger National Park (KNP), South Africa (0.90 for Grobler (1980); 0.54 for Ndlovu &  
20 Combrink (2015); 0.51 for Welsh et al. (2019) in Kenya). Surprisingly, Hustler (1987) found  
21 PI of 5.39 and 6.71 for giraffes in two separate areas of HNP. Host availability should  
22 indeed influence oxpeckers' choice because the decrease in abundance of a key host such  
23 as the giraffe may force birds to switch to another less preferred but more numerous host  
24 with little fitness costs (Pyke, 1984; Hustler, 1987; Welsh et al., 2019). Here, host size plays  
25 a major role in host detection in flight and giraffes – like other large mammalian hosts – are  
26 easier to detect compared with smaller species (Grobler, 1980; Koenig, 1997). This is the  
27 main reason why the key host of oxpeckers alternates between buffaloes (Hustler, 1987),  
28 white rhinoceros (Ndlovu & Combrink, 2015) and giraffes (Grobler, 1980; Ndlovu &

1 Combrink, 2015). The past high PI of giraffes at HNP suggests that birds must have  
2 exploited others hosts in the 80ies such as black rhinoceros, white rhinoceros, roans and  
3 sables (see Hustler, 1987, for details). This interpretation is supported by change in the  
4 composition of HNP's community of large herbivores over the last decades, notably with the  
5 recent loss of the white rhinoceros (Valeix et al., 2008), which is consistent with the low PI  
6 values we report here for giraffes.

7 Focusing on the choice of individual giraffes by oxpeckers, we found a marked  
8 asymmetric distribution of birds (exponential distribution) whereby many carried no bird and  
9 a few ones were seen with up to 17 birds simultaneously (Fig. 2). This non-random  
10 distribution of oxpeckers among individual giraffes likely results from aggregation behaviour  
11 (Palmer & Packer, 2018). The aggregation coefficient  $k$  we found for the oxpecker  
12 distribution at HNP, close to 0, is typical of parasitic infections where only a few individuals  
13 are massively infested (Shaw et al., 1998). That oxpeckers similarly aggregate on a few  
14 giraffes would suggest they behave like parasites with their host in agreement with previous  
15 studies (Plantan, 2009; Nunn et al., 2011). Birds could use public information like  
16 conspecific density to chose a giraffe in a group (Doligez et al., 2004). Because oxpeckers  
17 mostly feed on ectoparasites, the marked aggregation of birds could indirectly mirror the  
18 distribution of ticks among giraffes. In mammals, infestation is indeed highly variable  
19 among hosts (*e.g.* Shaw et al., 1998; Brunner & Ostfeld, 2008). For instance, in roe deer  
20 (*Capreolus capreolus*), bank vole (*Clethrionomys glareolus*) and mountain hare (*Lepus*  
21 *timidus*), most host individuals bear few ticks and only a few individuals bear many (Horak  
22 et al., 1983; Talleklint & Jaenson, 1997; Mysterud et al., 2014). From this hypothesis, one  
23 could make indirect inference on tick burden of individual giraffes from the number of  
24 hosted oxpeckers, given the birds distribute themselves according to the ideal free  
25 distribution.

26 Within giraffes, we clearly found preferences for some body parts by oxpeckers. At HNP,  
27 oxpeckers were mostly found on the neck and the back of giraffes followed by the head, the  
28 abdomen, the lower limbs and the tail (see also Plantan, 2009; Ndlovu & Combrink, 2015,  
29 for similar results). The mane seems the most preferred giraffes' body part of oxpeckers

1 (Koenig, 1997). This row of hairs seems to be a favourable habitat for ectoparasites by  
2 providing shelter from predators (Ndlovu & Combrink, 2015) although oxpeckers use a  
3 scissoring behaviour to easily pick parasites from the hairs Koenig (1997). It has been  
4 noted that oxpeckers gather at the bigger host's mane to hide from predators or when they  
5 are alarmed, which may contribute to increase their number in this area. This behavior may  
6 reflect an important driver of oxpecker group dynamics. However, contrary to other smaller  
7 herbivores (see Warwick et al., 2016, on cattle and sheep), we expected a relatively low  
8 density of ticks on the giraffe's head because they rarely feed directly on the ground  
9 (Seeber et al., 2012). Our results support this assertion but oxpeckers could sometimes  
10 forage the head seeking for other food resources such as saliva, mucus, earwax (Ndlovu &  
11 Combrink, 2015) or wounds. This also could be the case for female genitalia where  
12 oxpeckers can also feed on mucus and secretion of their hosts (Weeks, 1999; Plantan,  
13 2009). The abdomen, groins and armpits, thighs and tail present the lowest density of  
14 oxpeckers. Unlike mane, these areas are parts that can be easily groomed by giraffes,  
15 depleting tick quickly and making this area less preferred for oxpeckers (Koenig, 1997;  
16 Ndlovu & Combrink, 2015). Assuming that abundance or presence of ticks is highest in the  
17 mane running on the neck and back of giraffes, our results would concur with the  
18 distribution of oxpeckers as predicted by the optimal foraging theory (Pyke, 1984).

19 Density of oxpeckers differed substantially according to the sex of the giraffe, with male  
20 hosts carrying 20% more birds than females (Fig. 4). That male large herbivores are more  
21 frequently used as hosts than females by oxpeckers has been also reported in Tanzania for  
22 cattle and, to a lower degree, for wild species (Diplock et al., 2018). We add to the these  
23 previous observations that heterogeneity in the number of oxpeckers per hosts is larger for  
24 male than female giraffes. The simplest explanation is the one of male giraffes being larger  
25 in size than females, more birds can feed on a male holding a constant *per capita* food rate.  
26 The large variability in male body size in giraffe populations implied by their long body  
27 development (Shorrocks, 2016, p. 74) is in line with the wider distribution in oxpecker  
28 number in males than in females. Besides, the negative relationship we found between bird  
29 density and the observed group size of males (Fig. 5) suggests an alternative yet simple

1 explanation for why males would carry more birds than females. Like in many sexually  
2 dimorphic species, male giraffes live in smaller social groups than females (Dagg, 2014).  
3 When a lone male is detected by an oxpecker flock, all birds will forage on this single  
4 individual, while they will likely disperse themselves on all group members if several giraffe  
5 are found in proximity.

6 From a functional viewpoint, the higher abundance of oxpeckers on male than on  
7 female giraffes could, more likely, proceed from a higher load in ectoparasites and hence,  
8 larger food resources for the birds (Mooring & Mundy, 1996). The effect of host sex on the  
9 ectoparasite load are however equivocal in mammals (Ferrari et al., 2004; Kiffner et al.,  
10 2013). For instance, Horak et al. (1987) reported more ticks (*Amblyomma hebraeum*) on  
11 male kudus, which could make the female less attractive to oxpeckers. Conversely, tick load  
12 was similar whatever the sex and age of red deer (*Cervus elaphus*) in Scandinavia  
13 (Myrsetrud et al., 2014). Male giraffes could carry more ticks than females because of  
14 intra-sexual fights for reproduction. Neck fights, opponent chasing and female mounting  
15 result in many injuries and open wounds all over male's body (Nunn et al., 2011). Being  
16 opportunistic feeders, oxpeckers would benefit from the higher wound- and tick-feeding  
17 opportunities on male giraffes (Plantan, 2009). Moreover, sexually active males have, in  
18 general, a weaker immunity than females (Foo et al., 2017), which could indirectly  
19 contribute to their overall higher tick load compared to females. Consequently, if oxpeckers  
20 feed on giraffe individuals based upon their tick load, our results support a more variable  
21 tick infestation among males than females because of their contrasting body condition or  
22 immune-system efficiency (Fig. 4).

23 To evaluate the reliability of the oxpecker detection and location on giraffes from  
24 photographs, we carried out a double-observer experiment on a sub-sample of our images.  
25 We found the overall detection of the birds from photos to be very high (99%) but ideally all  
26 should be analyzed by 2 observers. Although not perfect, one person only (RG) scrutinized  
27 the 500 photographs henceforth keeping the detection and condition of observation similar  
28 for the complete data set. A major advantage of oxpecker counts from photographs is to  
29 make the counts and analyses repeatable and, contrary to what one might think, the use of

1 one side of giraffes to locate and to count birds is an advantage because it avoids the issue  
2 of double counting. That said, we acknowledge that the major bias of our study was the  
3 location where the giraffe photographs were taken *i.e.* mainly around the many artificially  
4 maintained waterholes where large herbivores come to drink. When a large herbivore stand  
5 on the shore of waterholes, oxpeckers often use it as platform to rest, to sunbath, and to  
6 reach water to drink as well (Stutterheim, 1976). Consequently, the maximum number of  
7 oxpeckers per giraffe may be higher than elsewhere in HNP. To avoid this bias some  
8 studies tend to limit counting within 500 meters of water points (Grobler, 1980) but because  
9 HNP is densely covered with trees, observations of giraffes away from waterholes remained  
10 very difficult. Finally, we did not differentiate between yellow- and red-billed oxpeckers  
11 which behaviour in terms of host and body part selection differ slightly (Péron et al. 2019).  
12 Because the yellow-billed oxpecker was most abundant at HNP, our results are likely  
13 governed the behaviour of this *Buphagus* species rather than of the red-billed oxpecker.

## 14 **5 | CONCLUSION**

15 Our study puts forward that the distribution and abundance of oxpeckers were surprisingly  
16 heterogeneous among and within giraffes. Some host body parts are clearly preferred for  
17 foraging by birds such as the neck and the mane because those areas could be suitable  
18 habitats for ticks. Gregarious hosts (female giraffes, buffaloes) travel and forage as a group  
19 thereby increasing local abundance and transmission of ticks (Koenig, 1997) to which  
20 oxpeckers could be excellent control agents on wild large herbivores and on domestic ones  
21 too (Ndlovu & Combrink, 2015). From an ecological point of view, the oxpecker–large  
22 herbivores system proves to be highly relevant and useful for the study of host-parasite  
23 dynamics.

## 24 **Acknowledgements**

25 We would like to thank Simon Chamailé-James and Marion Valeix for their critical reading  
26 of the manuscript. Thanks are extended to Martin Muzamba and Trust Dube for their



1 invaluable help in data collection at Hwange, and to the park authorities of Zimbabwe for  
2 their support. Thanks are also extended to Fred Bercovitch and two anonymous reviewers  
3 for their interesting and constructive comments.

#### 4 **References**

- 5 Bezuidenhout, J. D., & Stutterheim, C. (1980). A critical evaluation of the role played by the  
6 red-billed oxpecker *Buphagus erythrorhynchus* in the biological control of ticks. *The*  
7 *Onderstepoort Journal of Veterinary Research*, *47*, 51–75.
- 8 Brooks, M. E., Kristensen, K., van Benthem, K. J., Magnusson, A., Berg, C. W., Nielsen, A., Skaug,  
9 H. J., Maechler, M., & Bolker, B. M. (2017). glmmTMB Balances Speed and Flexibility Among  
10 Packages for Zero-inflated Generalized Linear Mixed Modeling. *The R Journal*, *9*, 378–400.
- 11 Brunner, J. L., & Ostfeld, R. S. (2008). Multiple causes of variable tick burdens on small-mammal  
12 hosts. *Ecology*, *89*, 2259–2272.
- 13 Clark, C. W., & Mangel, M. (1986). The evolutionary advantages of group foraging. *Theoretical*  
14 *population biology*, *30*, 45–75.
- 15 Dagg, A. I. (2014). *Giraffe: biology, behaviour and conservation*. Cambridge University Press.
- 16 del Hoyo, J., Elliott, A., Sargatal, J., Christie, D., & de Juana, E. e. (2009). *Handbook of the Birds of*  
17 *the World Alive*. Lynx Edicions, Barcelona.
- 18 Diplock, N., Johnston, K., Mellon, A., Mitchell, L., Moore, M., Schneider, D., Taylor, A., Whitney, J.,  
19 Zegar, K., Kioko, J., & Kiffner, C. (2018). Large mammal declines and the incipient loss of  
20 mammal-bird mutualisms in an African savanna ecosystem. *PloS one*, *13*, e0202536.
- 21 Doligez, B., Pärt, T., Danchin, E., Clobert, J., & Gustafsson, L. (2004). Availability and use of public  
22 information and conspecific density for settlement decisions in the collared flycatcher. *Journal of*  
23 *Animal Ecology*, *73*, 75–87.
- 24 Emlen, S. T., & Oring, L. W. (1977). Ecology, sexual selection, and the evolution of mating systems.  
25 *Science*, *197*, 215–223.
- 26 Ferrari, N., Cattadori, I. M., Nespereira, J., Rizzoli, A., & Hudson, P. J. (2004). The role of host sex in  
27 parasite dynamics: field experiments on the yellow-necked mouse *Apodemus flavicollis*. *Ecology*  
28 *Letters*, *7*, 88–94.
- 29 Fiske, I., & Chandler, R. (2011). unmarked: An R package for fitting hierarchical models of wildlife  
30 occurrence and abundance. *Journal of Statistical Software*, *43*, 1–23.

- 1 Foo, Y. Z., Nakagawa, S., Rhodes, G., & Simmons, L. W. (2017). The effects of sex hormones on  
2 immune function: a meta-analysis. *Biological Reviews*, *92*, 551–571.
- 3 Fretwell, S. D., & Lucas, H. L. (1969). On territorial behavior and other factors influencing habitat  
4 distribution in birds. *Acta Biotheoretica*, *19*, 16–36. doi:10.1007/bf01601953
- 5 Grobler, J. H. (1980). Host selection and species preference of the red-billed oxpecker *Buphagus*  
6 *erythrorhynchus* in the Kruger National Park. *Koedoe*, *23*. doi:10.4102/koedoe.v23i1.637
- 7 Gueron, S., & Levin, S. A. (1995). The dynamics of group formation. *Mathematical Biosciences*,  
8 *128*, 243–264.
- 9 Horak, I., MacIvor, K., Petney, T., & De, V. V. (1987). Some avian and mammalian hosts of  
10 *Amblyomma hebraeum* and *Amblyomma marmoreum* (Acari: Ixodidae). *The Onderstepoort*  
11 *Journal of Veterinary Research*, *54*, 397–403.
- 12 Horak, I., Potgieter, F., Walker, J. B., De Vos, V., & Boomker, J. (1983). The ixodid tick burdens of  
13 various large ruminant species in South African nature reserves. *Onderstepoort Journal of*  
14 *Veterinary Research*, *50*, 221–228.
- 15 Hustler, K. (1987). Host preference of oxpeckers in the Hwange National Park, Zimbabwe. *African*  
16 *Journal of Ecology*, *25*, 241–245. doi:10.1111/j.1365-2028.1987.tb01115.x
- 17 Hutchinson, J. M., & Waser, P. M. (2007). Use, misuse and extensions of “ideal gas” models of  
18 animal encounter. *Biological Reviews*, *82*, 335–359.
- 19 Johnson, D. H. (1980). The comparison of usage and availability measurements for evaluating  
20 resource preference. *Ecology*, *61*, 65–71.
- 21 Kiffner, C., Stanko, M., Morand, S., Khokhlova, I. S., Shenbrot, G. I., Laudisoit, A., Leirs, H.,  
22 Hawlena, H., & Krasnov, B. R. (2013). Sex-biased parasitism is not universal: evidence from  
23 rodent–flea associations from three biomes. *Oecologia*, *173*, 1009–1022.
- 24 Koenig, W. D. (1997). Host preferences and behaviour of oxpeckers: co-existence of similar species  
25 in a fragmented landscape. *Evolutionary Ecology*, *11*, 91–104. doi:10.1023/a:1018439614008
- 26 Krebs, C. J. (1972). The experimental analysis of distribution and abundance. *New York: Harper*  
27 *and Row*.
- 28 Lack, D. L. (1966). *Population studies of birds*. Clarendon P.
- 29 Lotka, A. J. (1956). *Elements of mathematical biology*.
- 30 MacArthur, R. H. (1972). *Geographical ecology: patterns in the distribution of species*. Princeton  
31 University Press.
- 32 Manly, B. (2007). *Randomization, bootstrap, and Monte Carlo methods in biology*. Boca Raton, FL:

- 1 Chapman & Hall/CRC.
- 2 May, R. M. (1978). Host-parasitoid systems in patchy environments: a phenomenological model.  
3 *Journal of Animal Ecology*, 47, 833–843.
- 4 Mooring, M. S., & Mundy, P. J. (1996). Interactions between impala and oxpeckers at Matobo  
5 National Park, Zimbabwe. *African Journal of Ecology*, 34, 54–65.
- 6 Morales, J. M., Moorcroft, P. R., Matthiopoulos, J., Frair, J. L., Kie, J. G., Powell, R. A., Merrill, E. H.,  
7 & Haydon, D. T. (2010). Building the bridge between animal movement and population dynamics.  
8 *Philosophical Transactions of the Royal Society B: Biological Sciences*, 365, 2289–2301.
- 9 Moreau, R. E. (1933). The food of the red-billed oxpecker, *Buphagus erythrorhynchus* (Stanley).  
10 *Bulletin of Entomological Research*, 24, 325. doi:10.1017/s000748530003162x
- 11 Muller, Z., Bercovitch, F., Brand, R., Brown, D., Brown, M., Bolger, D., Carter, K., Deacon, F.,  
12 Doherty, J., Fennessy, J., Fennessy, S., Hussein, A., Lee, D., Marais, A., Strauss, M., Tutchings,  
13 A., & Wube, T. (2018). *Giraffa camelopardalis* (amended version of 2016 assessment). The IUCN  
14 Red List of threatened species 2018: e.T9194A136266699.  
15 <http://dx.doi.org/10.2305/IUCN.UK.2016-3.RLTS.T9194A136266699.en>.  
16 [Downloaded on 13 September 2019].
- 17 Mysterud, A., Hatlegjerde, I. L., & Sørensen, O. J. (2014). Attachment site selection of life stages of  
18 *Ixodes ricinus* ticks on a main large host in Europe, the red deer (*Cervus elaphus*). *Parasites &*  
19 *Vectors*, 7. doi:10.1186/s13071-014-0510-x
- 20 Ndlovu, M., & Combrink, L. (2015). Feeding preferences of oxpeckers in Kruger National Park,  
21 South Africa. *Koedoe*, 57. doi:10.4102/koedoe.v57i1.1316
- 22 Nichols, J. D., Hines, J. E., Sauer, J. R., Fallon, F. W., Fallon, J. E., & Heglund, P. J. (2000). A  
23 double-observer approach for estimating detection probability and abundance from point counts.  
24 *The Auk*, 117, 393–408.
- 25 Nunn, C. L., Ezenwa, V. O., Arnold, C., & Koenig, W. D. (2011). Mutualism or parasitism? Using a  
26 phylogenetic approach to characterize the oxpecker-ungulate relationship. *Evolution*, 65,  
27 1297–1304. doi:10.1111/j.1558-5646.2010.01212.x
- 28 Ostfeld, R. S., & Keesing, F. (2000). Pulsed resources and community dynamics of consumers in  
29 terrestrial ecosystems. *Trends in Ecology & Evolution*, 15, 232–237.
- 30 Palmer, M. S., & Packer, C. (2018). Giraffe bed and breakfast: Camera traps reveal Tanzanian  
31 yellow-billed oxpeckers roosting on their large mammalian hosts. *African Journal of Ecology*.  
32 doi:10.1111/aje.12505

- 1 Pielou, E. (1969). An introduction to mathematical ecology. *An introduction to mathematical*  
2 *ecology*.
- 3 Plantan, T. B. (2009). *Feeding behaviour of wild and captive oxpeckers (Buphagus spp.): a case of*  
4 *conditional mutualism*. Ph.D. thesis, University of Miami.
- 5 Pyke, G. H. (1984). Optimal foraging theory: A critical review. *Annual Review of Ecology and*  
6 *Systematics*, 15, 523–575. doi:10.1146/annurev.es.15.110184.002515
- 7 R Core Team (2018). *R: A Language and Environment for Statistical Computing*. R Foundation for  
8 Statistical Computing, Vienna, Austria.
- 9 Samish, M., & Rehacek, J. (1999). Pathogens and predators of ticks and their potential in biological  
10 control. *Annual Review of Entomology*, 44, 159–182. doi:10.1146/annurev.ento.44.1.159
- 11 Seeber, P. A., Ndlovu, H. T., Duncan, P., & Ganswindt, A. (2012). Grazing behaviour of the giraffe in  
12 Hwange National Park, Zimbabwe. *African Journal of Ecology*, 50, 247.
- 13 Shaw, D., Grenfell, B., & Dobson, A. (1998). Patterns of macroparasite aggregation in wildlife host  
14 populations. *Parasitology*, 117, 597–610.
- 15 Shorrocks, B. (2016). *The giraffe: biology, ecology, evolution and behaviour*. John Wiley & Sons.
- 16 Sjöberg, M., Albrechtsen, B., & Hjältén, J. (2000). Truncated power laws: a tool for understanding  
17 aggregation patterns in animals? *Ecology letters*, 3, 90–94.
- 18 Stutterheim, C. (1976). *The biology of the red-billed oxpecker, Buphagus erythrorhynchus (Stanley*  
19 *1814) in the Kruger National Park*. Master's thesis, University of Pretoria, South African.
- 20 Stutterheim, I. M., Bezuidenhout, J. D., & Elliot, E. (1988). Comparative feeding behaviour and food  
21 preferences of oxpeckers (*Buphagus erythrorhynchus* and *B. africanus*) in captivity. *The*  
22 *Onderstepoort Journal of Veterinary Research*.
- 23 Talleklint, L., & Jaenson, T. G. (1997). Infestation of mammals by *Ixodes ricinus* ticks (Acari:  
24 Ixodidae) in south-central Sweden. *Experimental & applied acarology*, 21, 755–771.
- 25 Taylor, L., Woiwod, I., & Perry, J. (1979). The negative binomial as a dynamic ecological model for  
26 aggregation, and the density dependence of  $k$ . *The Journal of Animal Ecology*, (pp. 289–304).
- 27 Valeix, M., Fritz, H., Chamaillé-Jammes, S., Bourgarel, M., & Murindagomo, F. (2008). Fluctuations  
28 in abundance of large herbivore populations: insights into the influence of dry season rainfall and  
29 elephant numbers from long-term data. *Animal Conservation*, 11, 391–400.
- 30 van Someren, V. D. (1951). The red-billed oxpecker and its relation to stock in Kenya. *The East*  
31 *African Agricultural Journal*, 17, 1–11.
- 32 Venables, W. N., & Ripley, B. D. (2002). *Modern Applied Statistics with S*. New York: Springer,

- 1 fourth edition. ISBN 0-387-95457-0.
- 2 Ver Hoef, J. M., & Boveng, P. L. (2007). Quasi-Poisson vs. negative binomial regression: how should  
3 we model overdispersed count data? *Ecology*, *88*, 2766–2772.
- 4 Veríssimo, D., Cugnière, J.-C., Cugnière, S., Cugnière, J., Cugnière, G., & Cugnière, L. (2017).  
5 Record number of yellow-billed oxpeckers *Buphagus africanus* Linnaeus, 1766 (Aves:  
6 Passeriformes: Buphagidae) foraging on a single host. *Journal of Threatened Taxa*, *9*, 9768.  
7 doi:10.11609/jott.3055.9.1.9768-9770
- 8 Warwick, B. T., Bak, E., Baldassarre, J., Gregg, E., Martinez, R., Kioko, J., Saning'o, K., & Kiffner, C.  
9 (2016). Abundance estimations of ixodid ticks on Boran cattle and Somali sheep in Northern  
10 Tanzania. *International Journal of Acarology*, *42*, 12–17.
- 11 Weeks, P. (1999). Interactions between red-billed oxpeckers, *Buphagus erythrorhynchus*, and  
12 domestic cattle, *Bos taurus*, in Zimbabwe. *Animal Behaviour*, *58*, 1253–1259.  
13 doi:10.1006/anbe.1999.1265
- 14 Weeks, P. (2000). Red-billed oxpeckers: vampires or tickbirds? *Behavioral Ecology*, *11*, 154–160.  
15 doi:10.1093/beheco/11.2.154
- 16 Welsh, E. C., Keesing, F., & Allan, B. F. (2019). Oxpecker (*Buphagus erythrorhynchus*, *Buphagus*  
17 *africanus*) and tick abundances in acaricide-treated livestock areas. *African Journal of Ecology*,  
18 *57*, 155–159.
- 19 Wittenberger, J. F. (1981). *Animal social behavior*. Duxbury Press.

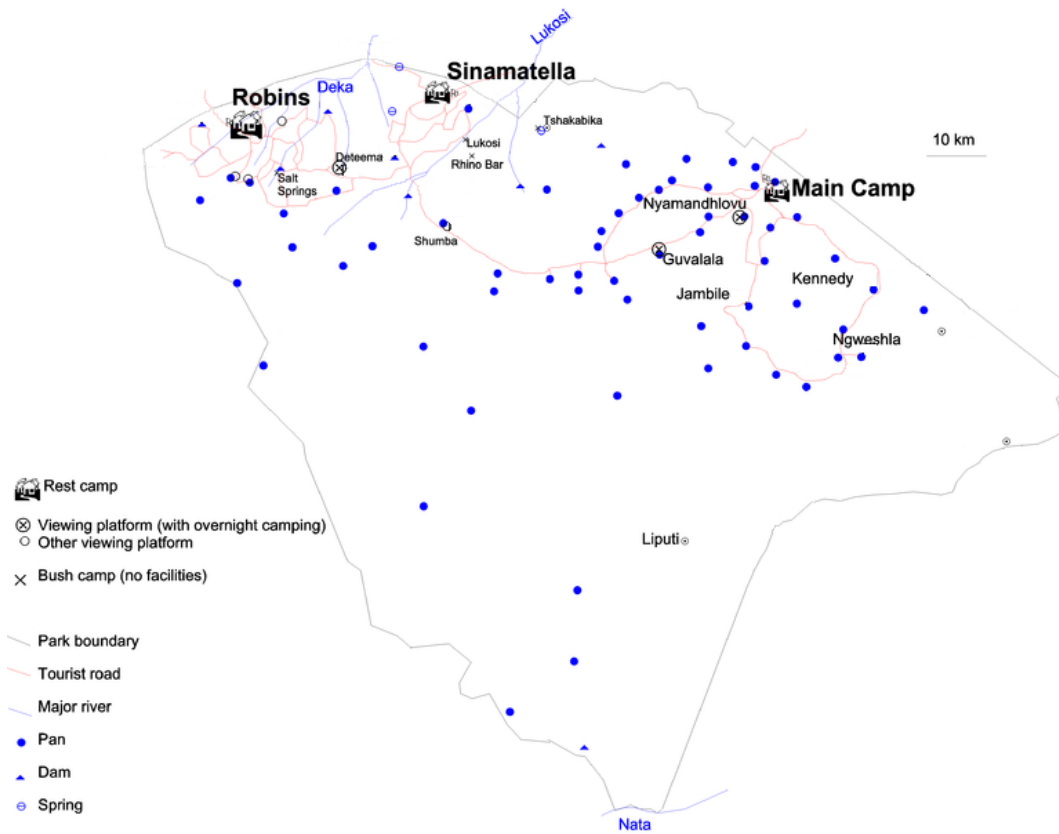

**Fig. 1** Hwange National Park map, Zimbabwe. The data collected (2013-2015) from oxpeckers (*Buphagus sp.*) and giraffes (*Giraffa camelopardalis*) derived from a study located in the Main Camp area, covering the north east of the park from Ngweshla to Giraffe Springs passing through Jambile. ('Hwange National Park' 2019, in Wikipedia: The Free Encyclopedia, Wikimedia Foundation Inc., viewed 11 May 2019, <[https://en.wikipedia.org/wiki/Hwange\\_National\\_Park](https://en.wikipedia.org/wiki/Hwange_National_Park)>)

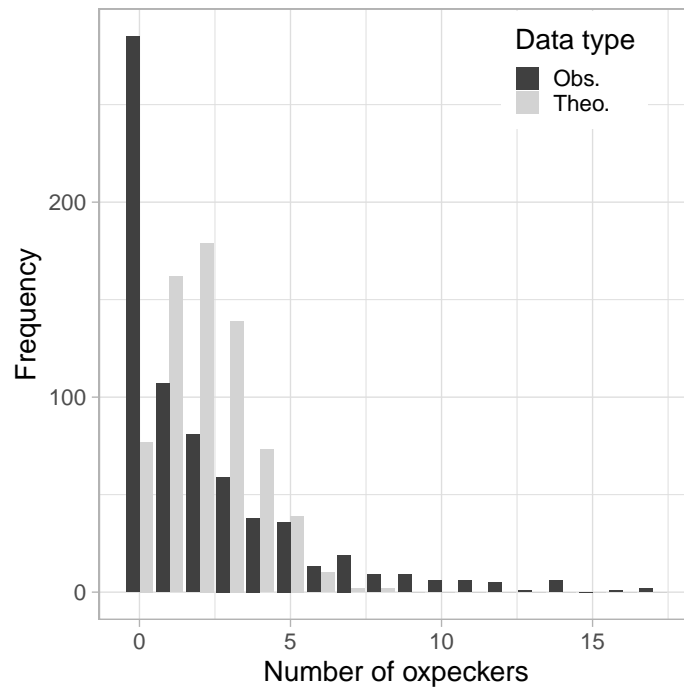

**Fig. 2** Distribution of oxpeckers (*Buphagus sp.*) on individual giraffes (*Giraffa camelopardalis*) at Hwange National Park, Zimbabwe. In black is the observed distribution and in grey the expected distribution according to a Poisson distribution law taking the observed mean as parameter ( $\lambda = 2.16$ ). Note the marked over-representation of giraffes carrying no bird and the long distribution tail of giraffes with numerous birds on their body in the observed data.

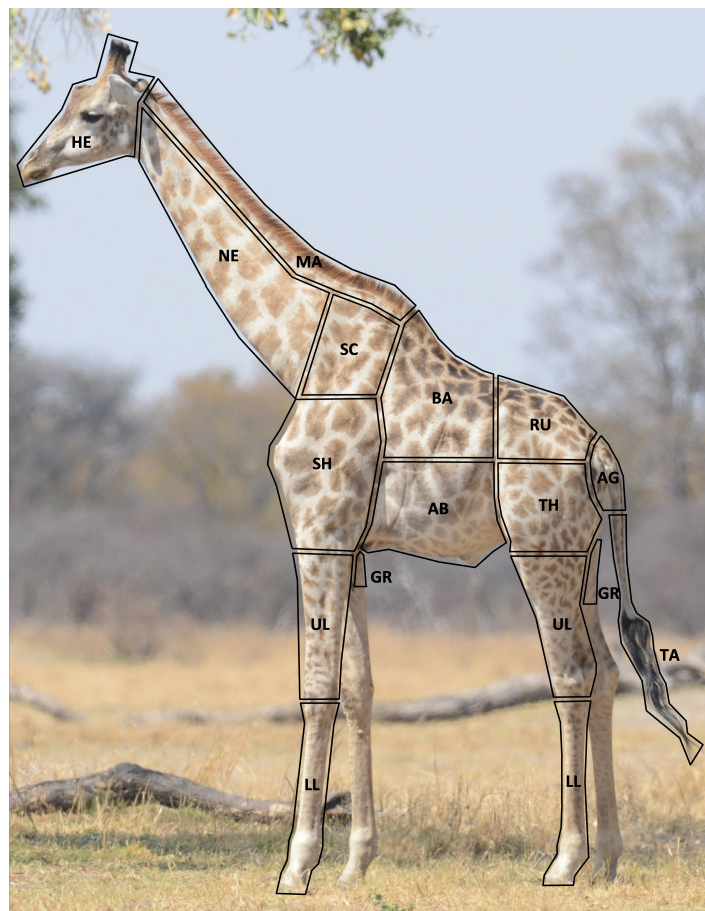

(A)



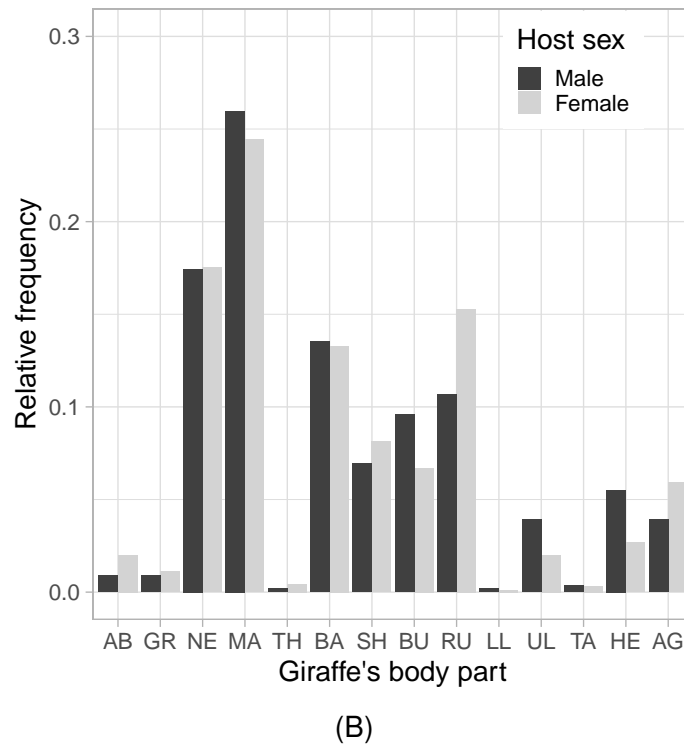

**Fig. 3** (A) Defined zonation and (B) proportion of oxpeckers (*Buphagus sp.*) counted on the 14 different body parts of giraffes (*Giraffa camelopardalis*) observed at Hwange National Park, Zimbabwe ( $n = 683$  giraffes). The two-letter acronyms of the x-axis stand for: AB: abdomen, GR: groin, NE: neck, MA: mane, TH: thigh, BA: back, SH: shoulder, RU: rump, SC: scapula, LL: lower leg, UL: upper leg, TA: tail, HE: head, AG: ano-genital.

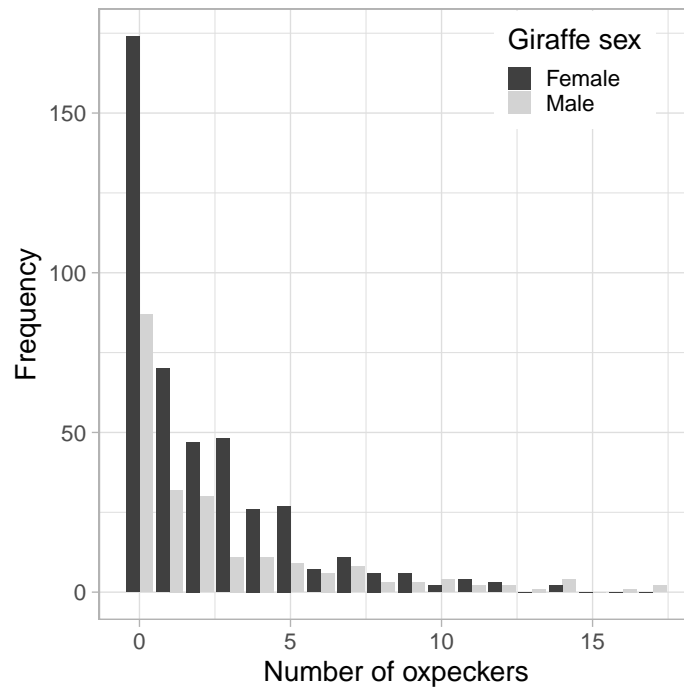

**Fig. 4** Distribution of oxpeckers (*Buphagus sp.*) on male and female giraffes (*Giraffa camelopardalis*) at Hwange National Park, Zimbabwe. Curves are the predicted frequencies as given by a negative binomial distribution model which parameters have been estimated separately for the two sexes. Vertical dashed lines represent the mean number of oxpeckers carried by individual giraffes. Note that males with no oxpecker are less frequent than females, and that the largest aggregations of oxpeckers have been found on male giraffes.

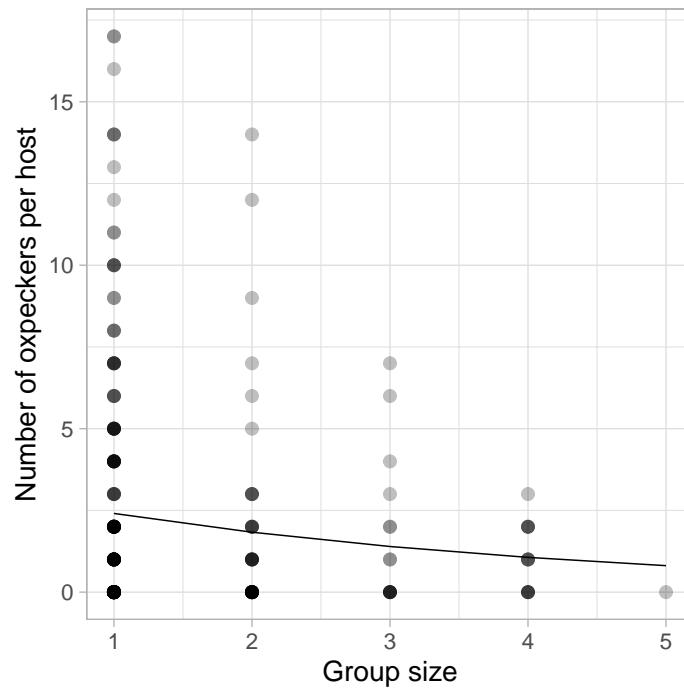

**Fig. 5** Variation in the number of oxpeckers (*Buphagus sp.*) per host according the group size of male giraffes (*Giraffa camelopardalis*) observed at Hwange National Park, Zimbabwe. Color density of dots is proportional to the number of observations (darker dots mean several records). The continuous black curve is the predicted density of oxpeckers by a generalized linear model with a negative binomial distribution ( $\beta = XX \pm YY$ ,  $P < 0.001$ ).
